# Supplementary material
Source: PubMed Central journal article supplement (PMC4143479)
Supplement: NIHMS590613-supplement-Form_1.pdf [file NIHMS590613-supplement-Form_1.pdf]

Warning: This form is not supported with the current version of Acrobat or Adobe Reader.  
Upgrade to the latest version for full support.
